# Supplementary material for: Splitting and separation mechanism of tenofovir alafenamide fumarate chiral isomers based on indirect chiral ligand exchange chromatography
Source: Royal Society of Chemistry journal article supplement (doi:10.1039/d4ay01388c), 2024-01-01
Supplement: d4ay01388c1.pdf [file d4ay01388c1.pdf]

### Supporting Information

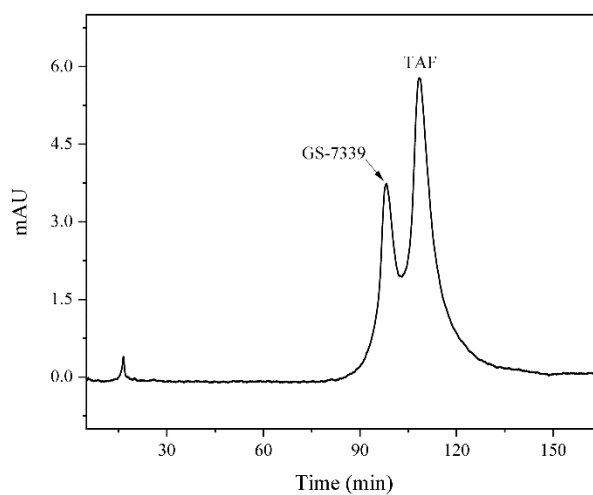

**Fig. S1 Chromatogram of TAF and GS-7339 on the CHIRALCEL OJ-RH column.**

Mobile phase: water–acetonitrile (90:10); flow rate: 0.8 mL/min; column temperature: 20 °C; 40 µg/mL TAF and 40 µg/mL GS-7339.

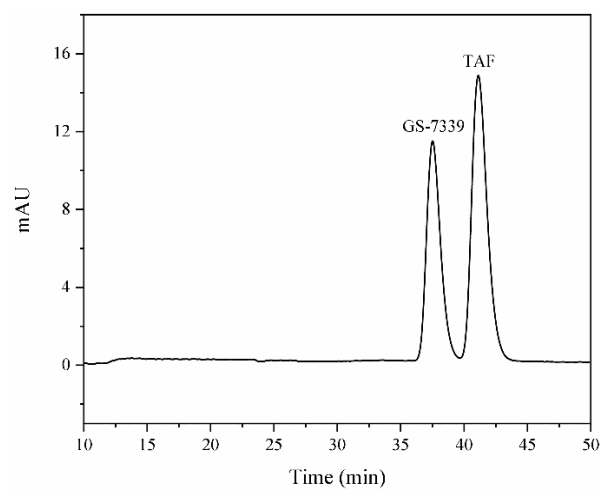

**Fig. S2 Chromatogram of ligand exchanged complex solution at 20 mM ammonium dihydrogen phosphate (pH = 4.0)-methanol (58:42). 30 µg/mL TAF and 30 µg/mL GS-7339.**
